# Supplementary material for: Sub‐50 nm Iron–Nitrogen‐Doped Hollow Carbon Sphere‐Encapsulated Iron Carbide Nanoparticles as Efficient Oxygen Reduction Catalysts
Source: PubMed Central journal article supplement (PMC6051398; doi:10.1002/advs.201800120), 2018-05-12
Supplement: ADVS-5-1800120-s001.pdf [file ADVS-5-1800120-s001.pdf]

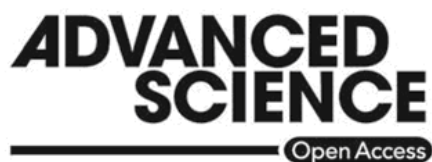

## Supporting Information

for *Adv. Sci.*, DOI: 10.1002/advs.201800120

Sub-50 nm Iron–Nitrogen-Doped Hollow Carbon Sphere-Encapsulated Iron Carbide Nanoparticles as Efficient Oxygen Reduction Catalysts

*Haibo Tan, Yunqi Li,\* Jeonghun Kim, Toshiaki Takei, Zhongli Wang, Xingtao Xu, Jie Wang, Yoshio Bando, Yong-Mook Kang, Jing Tang,\* and Yusuke Yamauchi\**

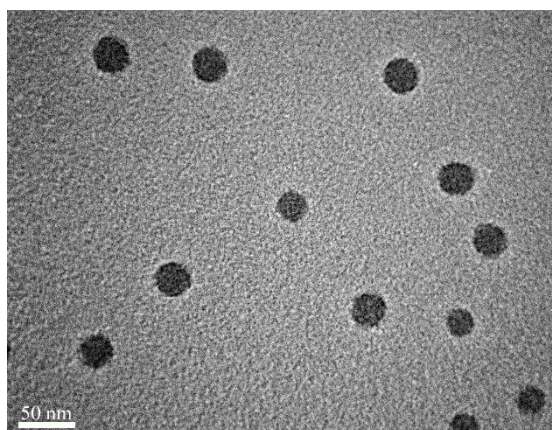

**Figure S1.** TEM image of triblock copolymer  $\text{PS}_{(20,000)}\text{-}b\text{-P2VP}_{(15,000)}\text{-}b\text{-PEO}_{(27,000)}$  micelles. PS cores (dark spheres) are stained with 1.0 wt% phosphotungstic acid. The size of the PS core is *ca.* 31 nm.

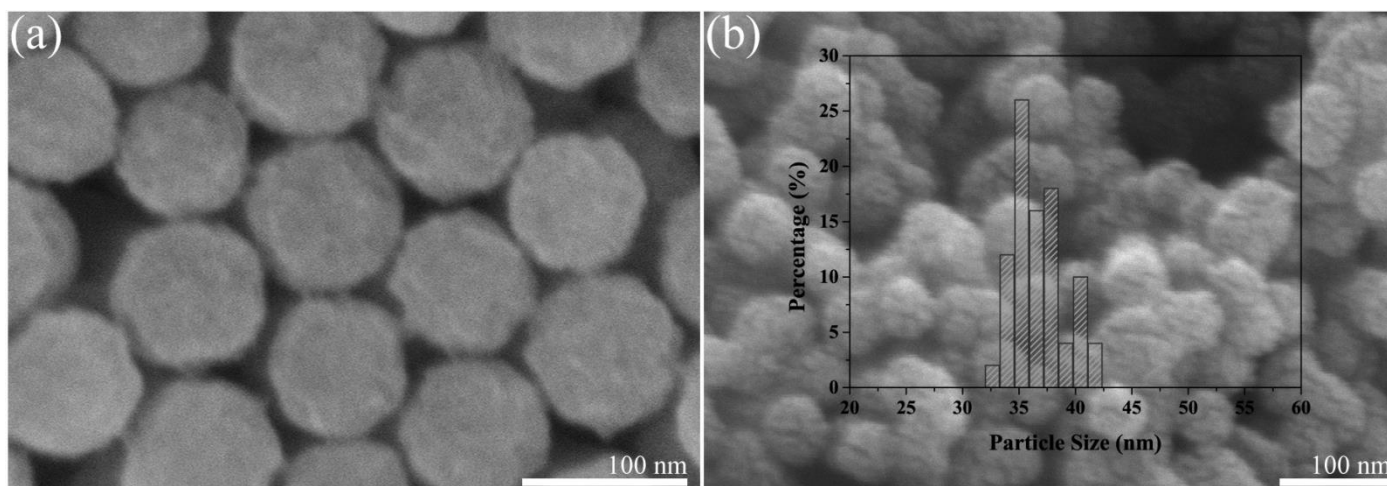

**Figure S2.** SEM images of (a) the as-prepared  $\text{Fe}_3\text{C-Fe,N/C}$  polymer precursor and (b) the corresponding carbonized product ( $\text{Fe}_3\text{C-Fe,N/C-900}$ ) at 900 °C.

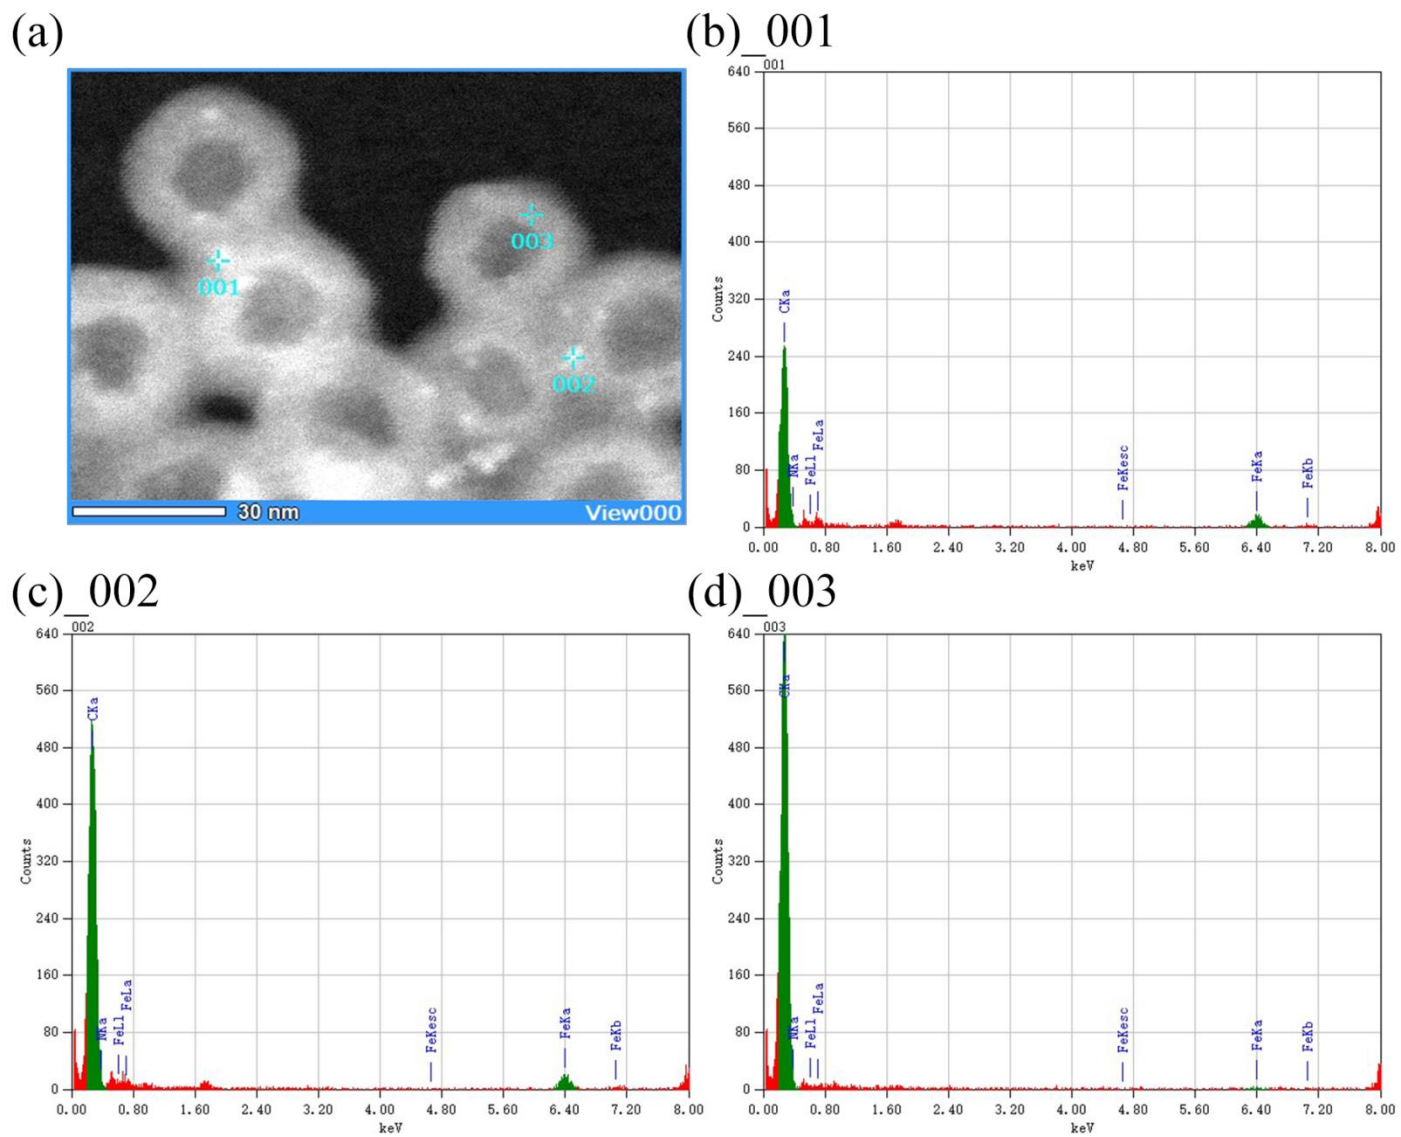

**Figure S3.** HAADF-STEM image of  $\text{Fe}_3\text{C}$ -Fe,N/C-900 hollow spheres and corresponding energy-dispersive X-ray (EDX) spectra of the selected spots.

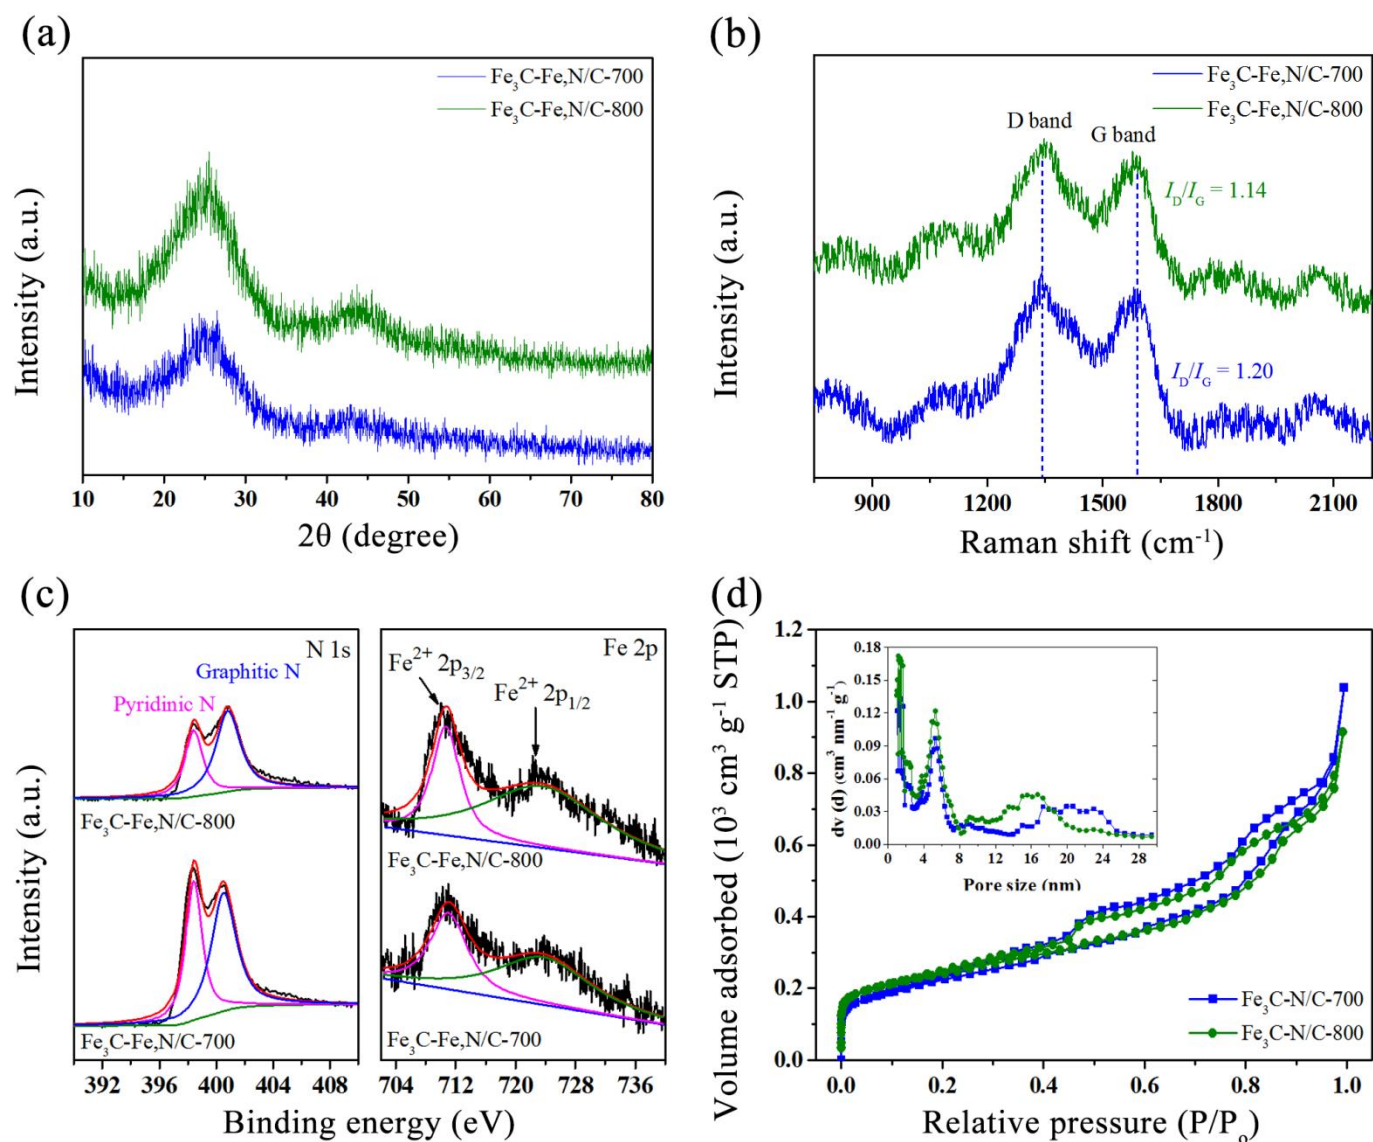

**Figure S4.** (a) XRD patterns, (b) Raman spectra, (c) high-resolution N 1s and Fe 2p XPS spectra, and (d) N<sub>2</sub> adsorption-desorption isotherms of Fe<sub>3</sub>C-Fe,N/C-*x* (*x* = 700, 800).

**Table S1.** Physicochemical properties of the hollow Fe<sub>3</sub>C-Fe,N/C-*x* and N/C-900 spheres

| Samples                      | S <sub>BET</sub><br>(m <sup>2</sup> g <sup>-1</sup> ) | S <sub>Micro</sub><br>(m <sup>2</sup> g <sup>-1</sup> ) | S <sub>Micro</sub> / S <sub>BET</sub> | V <sub>Pore</sub><br>(cm <sup>3</sup> g <sup>-1</sup> ) | V <sub>Micro</sub><br>(cm <sup>3</sup> g <sup>-1</sup> ) | V <sub>Micro</sub> /V <sub>Pore</sub> |
|------------------------------|-------------------------------------------------------|---------------------------------------------------------|---------------------------------------|---------------------------------------------------------|----------------------------------------------------------|---------------------------------------|
| N/C-900                      | 1143.0                                                | 328.6                                                   | 0.29                                  | 2.632                                                   | 0.144                                                    | 0.05                                  |
| Fe <sub>3</sub> C-Fe,N/C-700 | 805.1                                                 | 71.6                                                    | 0.09                                  | 1.306                                                   | 0.024                                                    | 0.02                                  |
| Fe <sub>3</sub> C-Fe,N/C-800 | 853.4                                                 | 194.5                                                   | 0.23                                  | 1.414                                                   | 0.086                                                    | 0.06                                  |
| Fe <sub>3</sub> C-Fe,N/C-900 | 879.5                                                 | 259.6                                                   | 0.30                                  | 1.590                                                   | 0.143                                                    | 0.09                                  |

S<sub>BET</sub>: Specific surface area

S<sub>Micro</sub>: Micropore surface area

V<sub>Pore</sub>: Pore volume

V<sub>Micro</sub>: Micropore volume

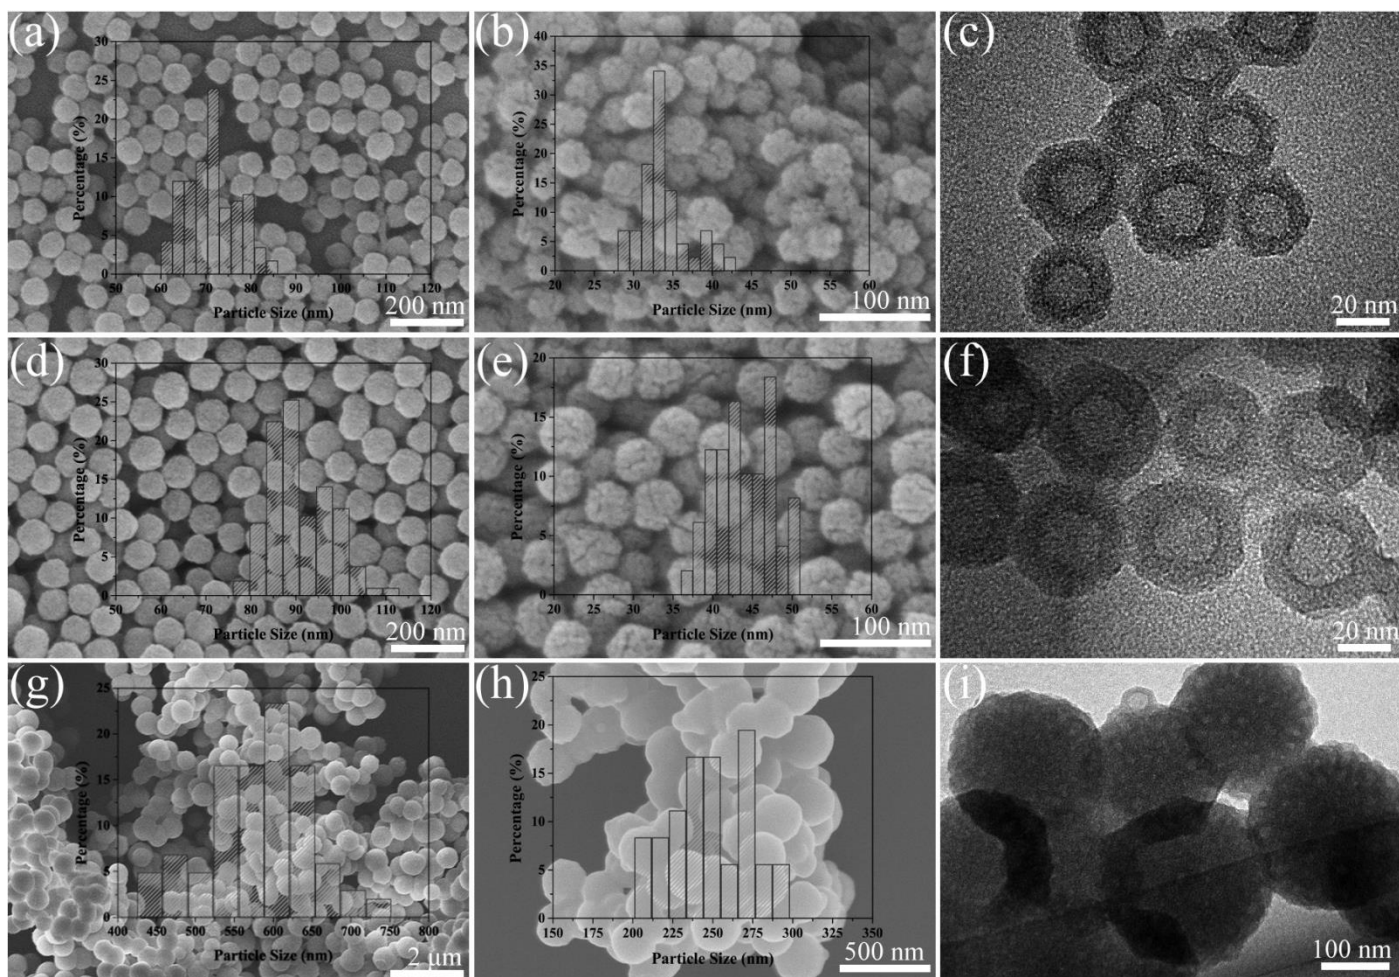

**Figure S5.** SEM and TEM images for the N/C precursor and carbonized products with different M-FR concentrations: (a) 0.03 M, (d) 0.05 M, and (g) 0.10 M, and their corresponding pyrolyzed products, (b, c), (e, f), and (h, i), at 800 °C.



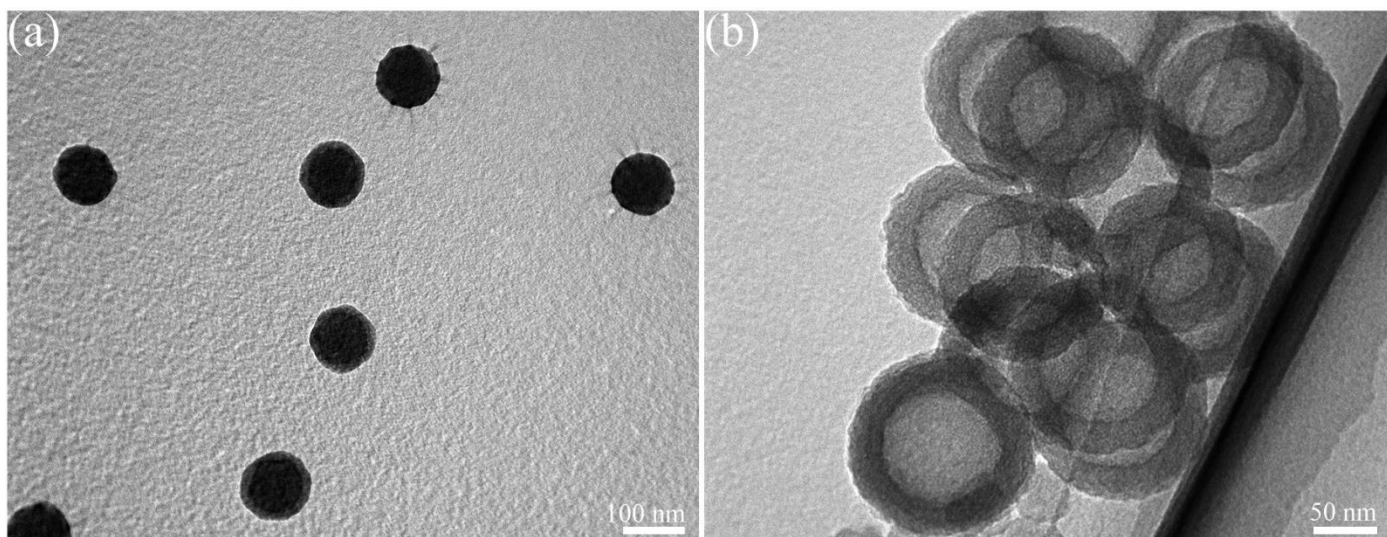

**Figure S6.** TEM images of micelles of triblock copolymer PS<sub>(45,000)</sub>-*b*-P2VP<sub>(26,000)</sub>-*b*-PEO<sub>(82,000)</sub> and hollow N/C pyrolyzed at 800 °C. The PS cores (dark spheres) were stained with 1.0 wt% phosphotungstic acid.

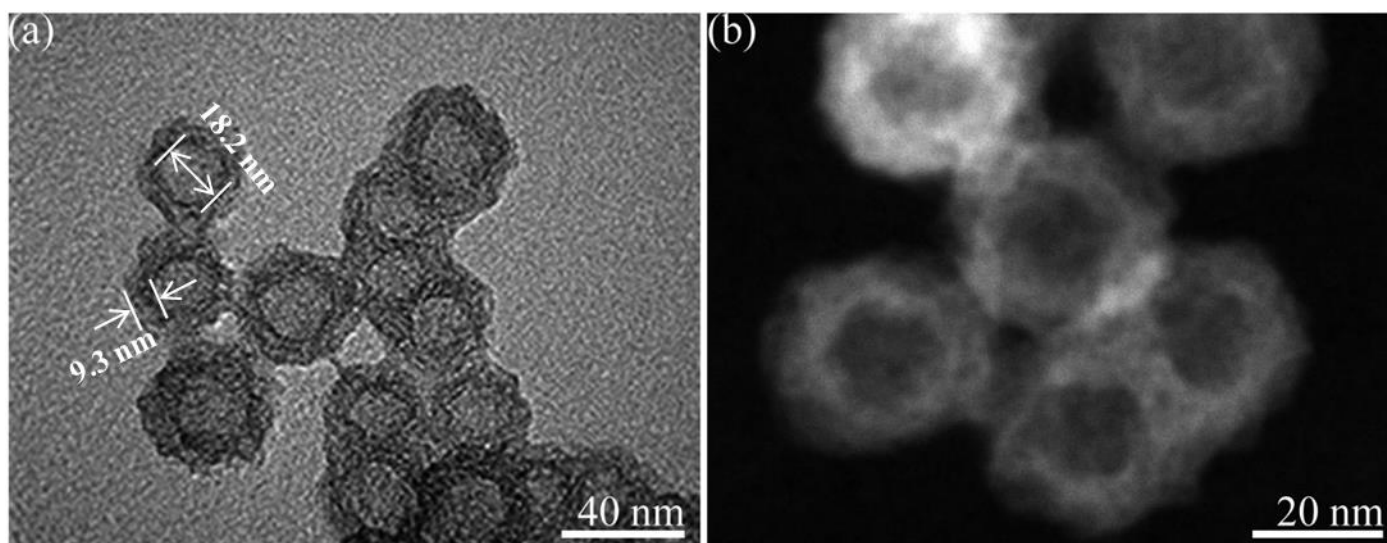

**Figure S7.** (a) TEM and (b) HAADF-STEM images of N/C-900 hollow spheres.

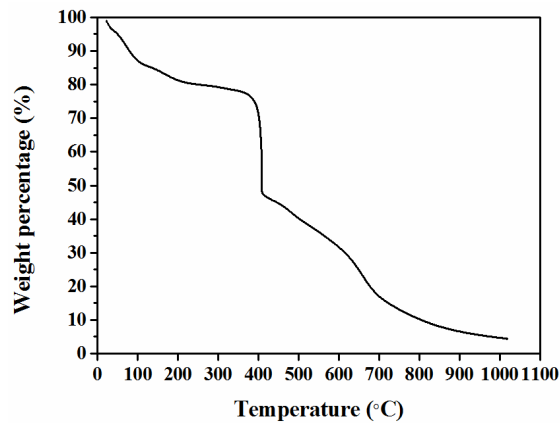

**Figure S8.** TGA curve of M-FR-coated triblock polymer micelles at a ramping rate of  $5\text{ }^{\circ}\text{C min}^{-1}$  under a  $\text{N}_2$  atmosphere.

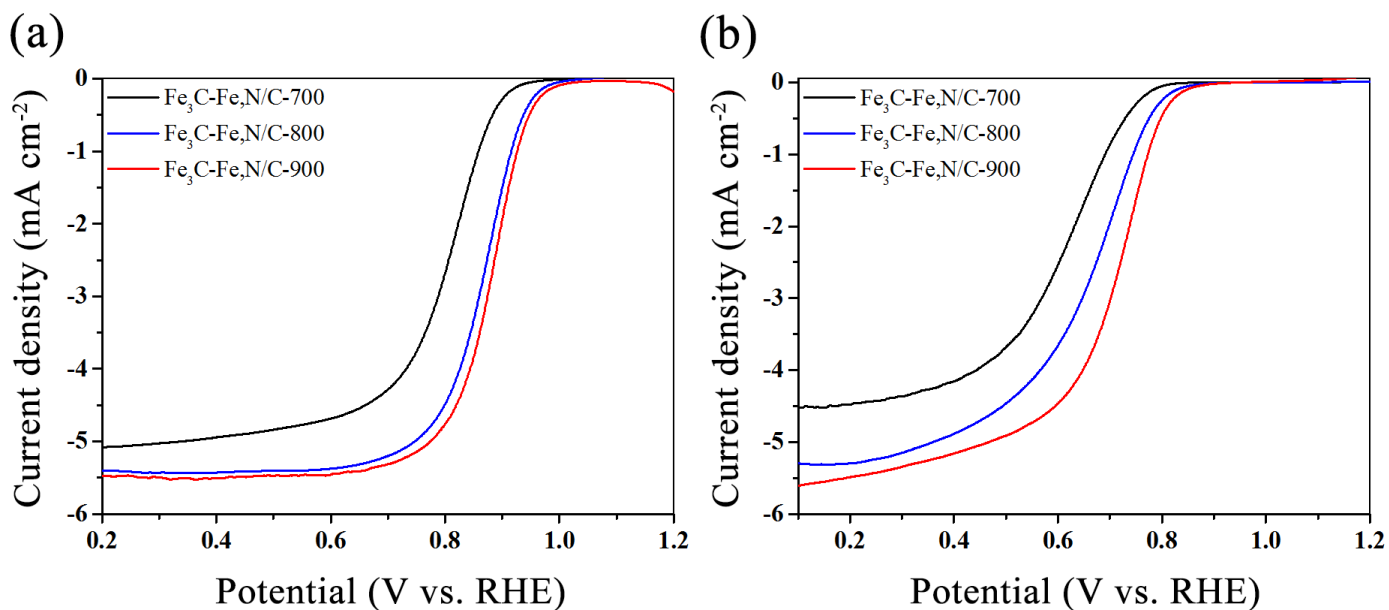

**Figure S9.** Linear sweep voltammetry (LSV) curves of  $\text{Fe}_3\text{C-Fe,N/C-}x$  ( $x = 700, 800, 900$ ) at a scan rate of  $10\text{ mV s}^{-1}$  under a rotation speed of  $1600\text{ rpm}$  in  $\text{O}_2/\text{N}_2$ -saturated (a)  $0.1\text{ M KOH}$  and (b)  $0.1\text{ M HClO}_4$ .

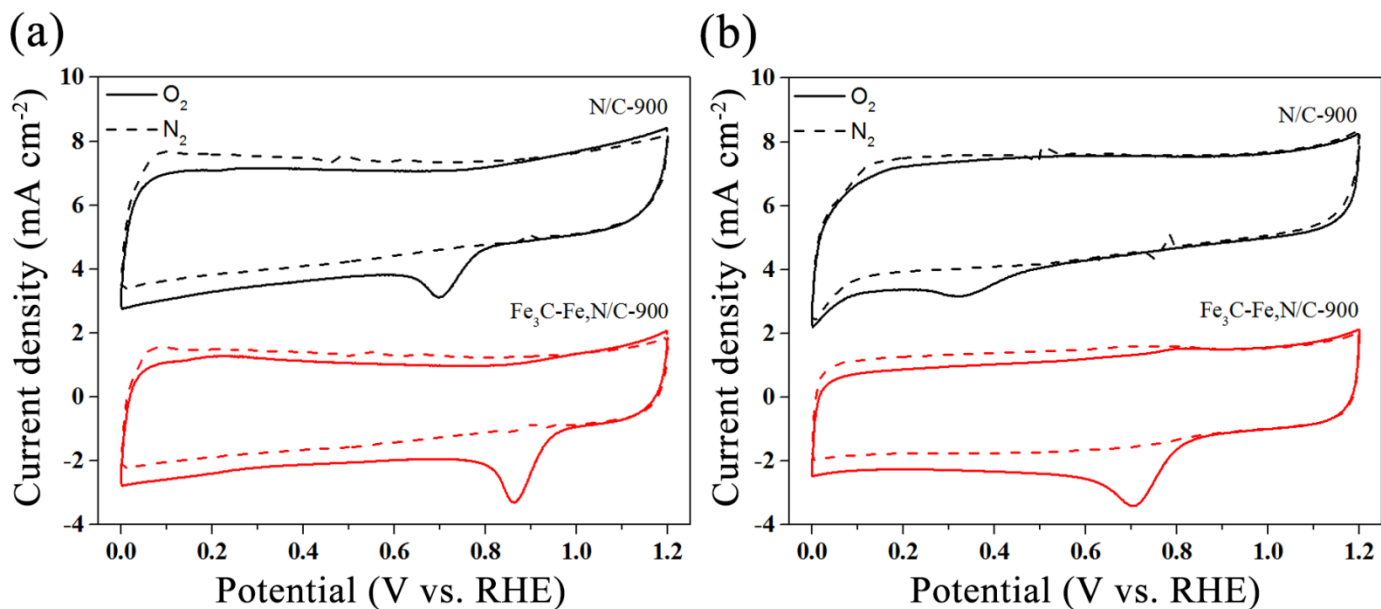

**Figure S10.** Cyclic voltammograms of Fe<sub>3</sub>C-Fe,N/C-900 and N/C-900 in O<sub>2</sub>/N<sub>2</sub>-saturated (a) 0.1 M KOH and (b) 0.1 M HClO<sub>4</sub>, respectively, at a scan rate of 50 mV s<sup>-1</sup>. For clarity, the current density for N/C-900 is offset vertically by 6 mA cm<sup>-2</sup>.



**Table S2.** Summary of ORR activities of Fe<sub>3</sub>C-Fe,N/C-900 and recently reported Fe<sub>3</sub>C-based catalysts in 0.1 M KOH (electrode rotation speed of 1600 rpm)

| Catalysts                    | Catalyst loading (mg cm <sup>-2</sup> ) | LSV scan rate (mV s <sup>-1</sup> ) | Half-wave potential (V vs. RHE)    | Current density (mA cm <sup>-2</sup> ) (potential vs. RHE) | Electron transfer number (potential vs. RHE)          | Reference |
|------------------------------|-----------------------------------------|-------------------------------------|------------------------------------|------------------------------------------------------------|-------------------------------------------------------|-----------|
| Fe <sub>3</sub> C-Fe,N/C-900 | 0.20                                    | 10                                  | 0.881                              | 5.53<br>(at 0.45 V)                                        | 3.98-4.05<br>(0.4 to 0.7 V)                           | This work |
| Fe <sub>3</sub> C/C-800      | 0.60                                    | 10<br>(900 rpm)                     | 0.83                               | ca. 3.9<br>(at 0.45 V)                                     | 3.8-4.0<br>(0.3 to 0.6 V)                             | [1]       |
| Fe/Fe <sub>3</sub> C @C/RGO  | 0.53                                    | 5                                   | 0.93                               | ca. 9.6<br>(at 0.45 V)                                     | 3.52-3.08<br>(0.5 to 0.7 V)                           | [2]       |
| Fe <sub>3</sub> C@NG 800-0.2 | 0.20                                    | 10                                  | 0.81                               | ca. 5.1<br>(at 0.45 V)                                     | 3.94<br>(0 to 0.8 V)                                  | [3]       |
| Fe-N-CNFs                    | 0.60                                    | 10                                  | -0.14<br>[vs. Ag/AgCl/KCl (3.5 M)] | ca. 5.14<br>[at -0.6 V vs. Ag/AgCl/KCl (3.5 M)]            | 3.93-3.95<br>[-0.4 to -0.6 V vs. Ag/AgCl/KCl (3.5 M)] | [4]       |
| Fe <sub>3</sub> C/NG -800    | 0.40                                    | 5                                   | 0.86                               | ca. 5.68<br>(at 0.45)                                      | 3.89-4.0<br>(0 to 0.8 V)                              | [5]       |
| Fe/Fe <sub>3</sub> C @N-rGO  | 0.25                                    | 5                                   | 0.82                               | ca. 5.35<br>(at 0.45 V)                                    | ca. 4.0<br>(0.4 to 0.7 V)                             | [6]       |
| F-PNG                        | 0.10                                    | 5                                   | -0.187<br>(vs. Ag/AgCl/KCl)        | ca. 4.33<br>(at -0.6 V vs. Ag/AgCl/KCl)                    | ca. 3.98<br>(-0.3 to -0.7 V vs. Ag/AgCl/KCl)          | [7]       |
| Fe-C/NG-10% -700-AL          | 0.28                                    | 10                                  | 0.793                              | 6.15<br>(at 0.45 V)                                        | Unknown                                               | [8]       |
| Fe <sub>3</sub> C@NC NF-900  | 0.41                                    | 10                                  | -0.121<br>(vs. SCE)                | 4.51<br>(Unknown)                                          | 3.8<br>(at -0.5 V vs. SCE)                            | [9]       |
| Fe <sub>3</sub> C@C -900     | 0.30                                    | 10                                  | 0.80                               | ca. 5.18<br>(at 0.45 V)                                    | 3.98-4.05<br>(0 to 0.5 V)                             | [10]      |

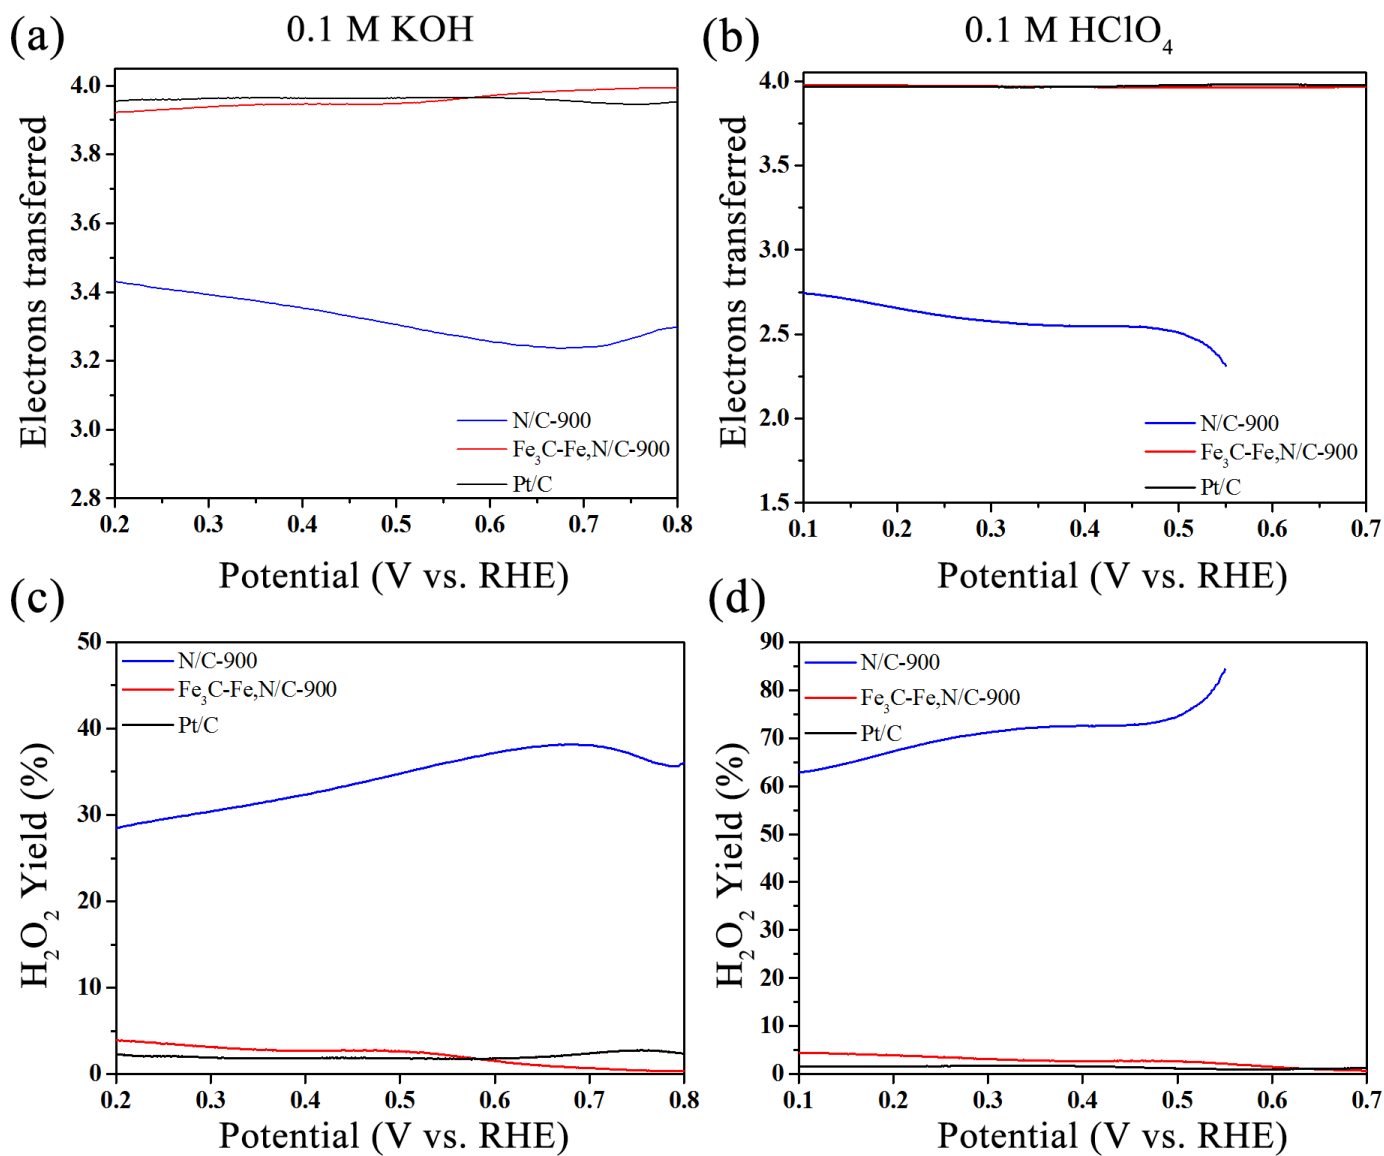

**Figure S11.** (a, b) Electron transfer number and (c, d) peroxide yield (H<sub>2</sub>O<sub>2</sub>) calculated based on disk-ring currents of N/C-900, Fe<sub>3</sub>C-Fe,N/C-900, and Pt/C in O<sub>2</sub>-saturated 0.1 M KOH and 0.1 M HClO<sub>4</sub> at a scan rate of 10 mV s<sup>-1</sup> under a rotation speed of 1600 rpm.

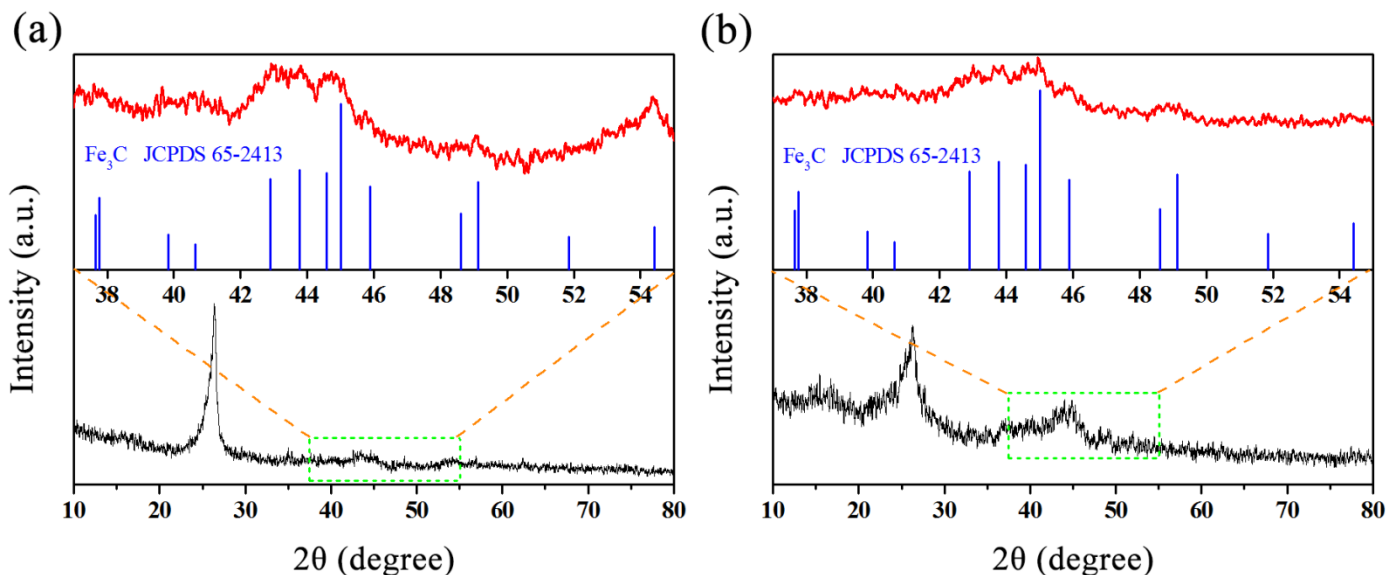

**Figure S12.** XRD patterns of  $\text{Fe}_3\text{C-Fe,N/C-900}$  after 5000 cycles in  $\text{O}_2/\text{N}_2$ -saturated (a) 0.1 M KOH and (b) 0.1 M  $\text{HClO}_4$ . Only 25  $\mu\text{g}$  of  $\text{Fe}_3\text{C-Fe,N/C-900}$  powder was deposited on the surface of a GC electrode for the general cycling measurement, which is insufficient for the XRD measurement. To obtain more powder, 2.5 mg of  $\text{Fe}_3\text{C-Fe,N/C-900}$  powder was deposited on a 1×1 cm carbon paper (Toray, TGP-H-090) and removed from the carbon paper after the cycling measurement by sonication. After cycling for the XRD measurement, the  $\text{Fe}_3\text{C-Fe,N/C-900}$  powder was mixed with graphite; the sharp diffraction peaks at  $26^\circ$  are mainly attributed to graphite.

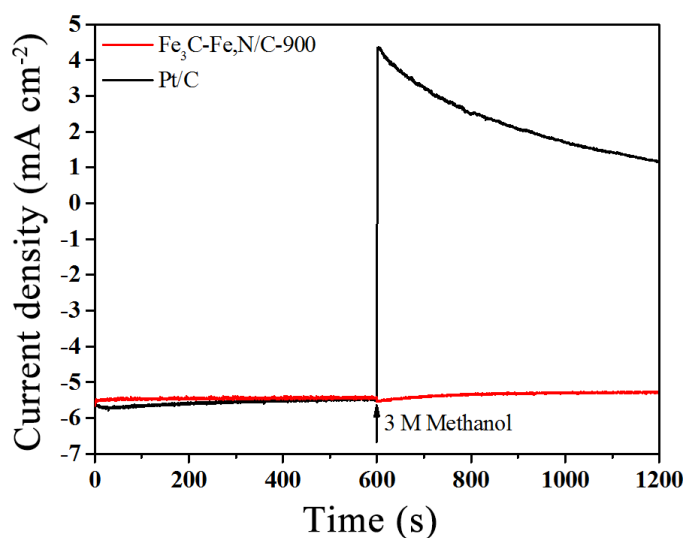

**Figure S13.** Chronoamperometric response with 3 M methanol of  $\text{Fe}_3\text{C-Fe,N/C-900}$  and Pt/C at 0.65 V and 1600 rpm in  $\text{O}_2$ -saturated 0.1 M KOH.

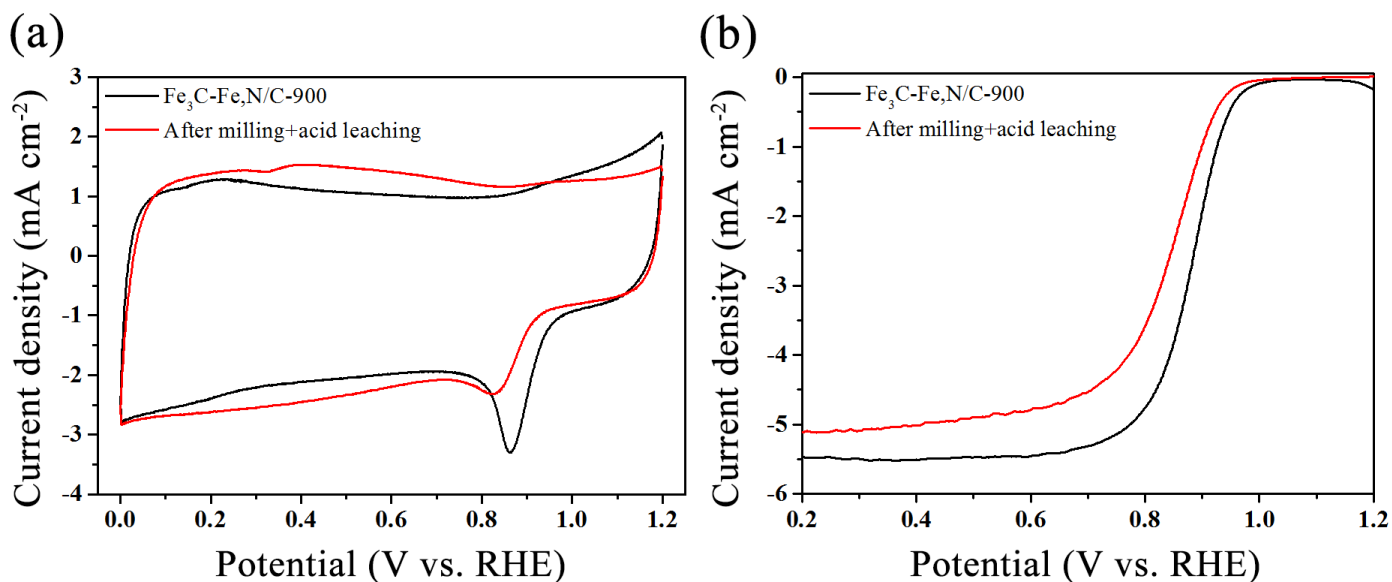

**Figure S14.** (a) CV and (b) LSV curves of  $\text{Fe}_3\text{C-Fe,N/C-900}$  and milled  $\text{Fe}_3\text{C-Fe,N/C-900}$  after hot acid leaching in  $\text{O}_2$ -saturated 0.1 M KOH.

## References

- [1] Y. Hu, J. O. Jensen, W. Zhang, L. N. Cleemann, W. Xing, N. J. Bjerrum, Q. Li, *Angew. Chem.* **2014**, *126*, 3749; *Angew. Chem. Int. Ed.* **2014**, *53*, 3675.
- [2] Y. Hou, T. Huang, Z. Wen, S. Mao, S. Cui, J. Chen, *Adv. Energy Mater.* **2014**, *4*, 1400337.
- [3] H. Jiang, Y. Yao, Y. Zhu, Y. Liu, Y. Su, X. Yang, C. Li, *ACS Appl. Mater. Interfaces* **2015**, *7*, 21511.
- [4] Z.Y. Wu, X.X. Xu, B.C. Hu, H.W. Liang, Y. Lin, L.F. Chen, S.H. Yu, *Angew. Chem.* **2015**, *127*, 8297; *Angew. Chem. Int. Ed.* **2015**, *54*, 8179.
- [5] M. Xiao, J. Zhu, L. Feng, C. Liu, W. Xing, *Adv. Mater.* **2015**, *27*, 2521.
- [6] Y. Liu, H. Wang, D. Lin, J. Zhao, C. Liu, J. Xie, Y. Cui, *Nano Res.* **2017**, *10*, 1213.
- [7] Y. Lai, W. Chen, Z. Zhang, Y. Qu, Y. Gan, J. Li, *Electrochim. Acta* **2016**, *191*, 733.
- [8] J. Xue, L. Zhao, Z. Dou, Y. Yang, Y. Guan, Z. Zhu, L. Cui, *RSC Adv.* **2016**, *6*, 110820.
- [9] G. Ren, X. Lu, Y. Li, Y. Zhu, L. Dai, L. Jiang, *ACS Appl. Mater. Interfaces* **2016**, *8*, 4118.
- [10] A. Kong, Y. Zhang, Z. Chen, A. Chen, C. Li, H. Wang, Y. Shan, *Carbon* **2017**, *116*, 606.
